# Supplementary material for: Association of Plant-Based and High-Protein Diets with a Lower Obesity Risk Defined by Fat Mass in Middle-Aged and Elderly Persons with a High Genetic Risk of Obesity
Source: MDPI journal article supplement (doi:10.3390/nu15041063), 2023-02-20
Supplement: s1 [file s1]

**Table S1.** Generalized multifactor dimensionality reduction (GMDR) results of multilocus interaction with genetic variants mainly related to obesity risk defined with fat mass.

| GMDR                                      | Adjusted for sex, age, area,<br>education, BMI |        |        |         | Adjusted for sex, age, area,<br>education, BMI, smoking, alcohol,<br>exercise |        |        |         |
|-------------------------------------------|------------------------------------------------|--------|--------|---------|-------------------------------------------------------------------------------|--------|--------|---------|
|                                           | Model                                          | TRBA   | TEBA   | P value | CVC                                                                           | TRBA   | TEBA   | P value |
| <i>SEC16B</i> _rs509325                   | 0.5154                                         | 0.5155 | 0.001  | 10      | 0.5154                                                                        | 0.5155 | 0.001  | 10      |
| <i>BDNF</i> _rs6265                       | 0.5189                                         | 0.5173 | 0.001  | 6       | 0.5189                                                                        | 0.5173 | 0.001  | 6       |
| <i>FTO</i> _rs1421085                     |                                                |        |        |         |                                                                               |        |        |         |
| <i>SEC16B</i> _rs509325<br>plus model 2   | 0.5229                                         | 0.5222 | 0.001  | 10      | 0.5229                                                                        | 0.5222 | 0.001  | 10      |
| <i>BAIAP2</i> _rs35867081<br>plus model 3 | 0.5265                                         | 0.5174 | 0.001  | 5       | 0.5265                                                                        | 0.5174 | 0.001  | 5       |
| <i>ADCY3</i> _rs6545790                   |                                                |        |        |         |                                                                               |        |        |         |
| <i>BDNF</i> _rs6265                       |                                                |        |        |         |                                                                               |        |        |         |
| <i>SEC16B</i> _rs509325                   | 0.5337                                         | 0.5167 | 0.001  | 9       | 0.5337                                                                        | 0.5167 | 0.001  | 9       |
| <i>BAIAP2</i> _rs35867081                 |                                                |        |        |         |                                                                               |        |        |         |
| <i>SYMPK</i> _rs60259426                  |                                                |        |        |         |                                                                               |        |        |         |
| <i>CDH4</i> _rs6089240 plus<br>model 5    | 0.5477                                         | 0.5146 | 0.001  | 10      | 0.5477                                                                        | 0.5146 | 0.001  | 10      |
| <i>FTO</i> _rs1421085<br>plus model 6     | 0.5663                                         | 0.5128 | 0.001  | 10      | 0.5663                                                                        | 0.5128 | 0.001  | 10      |
| <i>PSME4</i> _rs7560575<br>plus model 7   | 0.5899                                         | 0.5098 | 0.0107 | 10      | 0.5899                                                                        | 0.5098 | 0.0107 | 10      |
| <i>SLIT2</i> _rs2196476 plus<br>model 8   | 0.596                                          | 0.509  | 0.001  | 8       | 0.596                                                                         | 0.509  | 0.001  | 8       |
| <i>FARPI</i> _rs587056<br>plus model 9    | 0.6019                                         | 0.5069 | 0.0107 | 10      | 0.6019                                                                        | 0.5069 | 0.0107 | 10      |

TRBA, trained balanced accuracy; TEBA, test balance accuracy; CVC, cross-validation consistency; P-value for the significance of GMDR model by sign test with and without adjusting for covariates designated in the table. *COX10*, cytochrome C oxidase assembly factor heme A:farnesyltransferase; *AIG1*, androgen induced 1; *DLG2*, discs large MAGUK scaffold protein 2; *PLXNA4*, plexin A4; *SOX5*, SRY-box transcription factor 5; *IL12A*, interleukin 12A; *PTPRT*, protein tyrosine phosphatase receptor type T; *NMT1*, N-myristoyltransferase 1; *IFT122*, intraflagellar transport 122; *ARID1B*, AT-rich Interaction domain 1B.
